# Supplementary material for: An appetite for invasion: digestive physiology, thermal performance, and food intake in lionfish (Pterois spp.)
Source: Oxford University Press journal article supplement (doi:10.1242/jeb.209437), 2019-01-01
Supplement: jeb209437supp.pdf [file jeb209437supp.pdf]

## Supplementary Information

**Table S1.** Linear models and fits for SDA, peak SDA ( $SDA_{peak}$ ), SDA coefficient ( $SDA_{coeff}$ ), and SDA duration ( $SDA_{dur}$ ). Equations represent relationships between non-transformed data.

| Response variable | Model fit        | Equation                                                               |
|-------------------|------------------|------------------------------------------------------------------------|
| $SDA_{peak}$      | $r^2_{adj}=0.85$ | $SDA_{peak}=12.5 \cdot \%BM+1.16 \cdot SMR+0.24 \cdot scope+25.8$      |
| SDA               | $r^2_{adj}=0.62$ | $SDA=715.4 \cdot \%BM+17.2 \cdot scope-22.7 \cdot SMR-147.5$           |
| $SDA_{coeff}$     | $r^2_{adj}=0.14$ | $SDA_{coeff}=-0.95 \cdot \%BM+0.03 \cdot scope+0.0036 \cdot SMR+13.04$ |
| $SDA_{dur}$       | $r^2_{adj}=0.31$ | $SDA_{dur}=4.2 \cdot \%BM+0.23 \cdot scope-0.15 \cdot SMR+22.6$        |
